# Supplementary material
Source: Springer Nature journal article supplement (https://www.springermedizin.de/resource/supplementary/12889_2008_1166_MOESM5_ESM.pdf/9502600)
Supplement: MOESM5 [file 9502600]

**Self-administered Questionnaires (parents; children and adolescents 11 years of age and older)**

|                                                      |                                   |                               |                         |                                  |                   |
|------------------------------------------------------|-----------------------------------|-------------------------------|-------------------------|----------------------------------|-------------------|
| Physical Health (diseases, disability, malformation) | Behavioral and Emotional Problems | Social Determinants of Health | Health-related Behavior | Health Care Services utilization | Sociodemographics |
|------------------------------------------------------|-----------------------------------|-------------------------------|-------------------------|----------------------------------|-------------------|

**Computer Assisted Personal Interview (CAPI)**

|                                                    |                    |                                   |
|----------------------------------------------------|--------------------|-----------------------------------|
| History of selected physician-diagnosed conditions | Vaccination status | Medication use within past 7 days |
|----------------------------------------------------|--------------------|-----------------------------------|

**Physical Measurements and Tests**

|               |                            |              |                              |                                 |
|---------------|----------------------------|--------------|------------------------------|---------------------------------|
| Anthropometry | Blood pressure, heart rate | Vision tests | Motor activity, Coordination | Sonography of the thyroid gland |
|---------------|----------------------------|--------------|------------------------------|---------------------------------|

**Laboratory Tests (whole blood, serum, urine)**

|                                                                            |                                                          |                      |                               |
|----------------------------------------------------------------------------|----------------------------------------------------------|----------------------|-------------------------------|
| General Health Indices (clinical chemistry; red blood count; urine status) | Seroprevalence studies (infections, immunization status) | Atopic sensitization | Markers of nutritional status |
|----------------------------------------------------------------------------|----------------------------------------------------------|----------------------|-------------------------------|
